# Supplementary material
Source: MDPI journal article supplement (https://www.mdpi.com/2073-4344/9/5/472)
Supplement: s1 [file s1]

## Supplementary material

# Removal of Organic Micropollutants From a Municipal Wastewater Secondary Effluent by UVA-LED Photocatalytic Ozonation

Ana M. Chávez <sup>1</sup>, Ana R. Ribeiro <sup>2</sup>, Nuno F. F. Moreira <sup>2</sup>, Adrián M. T. Silva <sup>2,\*</sup>, Ana Rey <sup>1</sup>, Pedro M. Álvarez <sup>1</sup> and Fernando J. Beltrán <sup>1,\*</sup>

<sup>1</sup> Departamento de Ingeniería Química y Química Física, Instituto Universitario de Investigación del Agua, Cambio Climático y Sostenibilidad, Universidad de Extremadura, Avenida de Elvas S/N, 06006 Badajoz, Spain; amchavez@unex.es (A.M.C.), anarey@unex.es (A.R.), pmalvare@unex.es (P.M.A.), fbeltran@unex.es (F.J.B.).

<sup>2</sup> Laboratory of Separation and Reaction Engineering - Laboratory of Catalysis and Materials (LSRE-LCM), Faculdade de Engenharia, Universidade do Porto, Rua Dr. Roberto Frias s/n, 4200-465 Porto, Portugal; ritalado@fe.up.pt (A.R.R.), nmoreira@fe.up.pt (N.F.F.M.), adrian@fe.up.pt (A.M.T.S.).

\* Correspondence: fbeltran@unex.es, Tel.: +34-924- (F.J.B); adrian@fe.up.pt, +351-22 -041-4531 (A.M.T.S)

## S1. Simplified reaction mechanisms of oxidation processes studied [1]

### Photocatalytic oxidation:

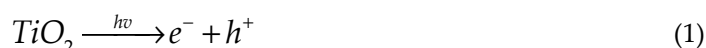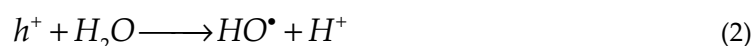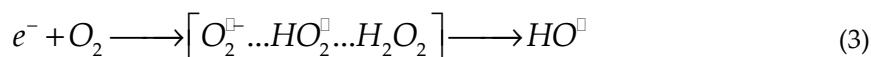

Initiation steps for HO<sup>•</sup> formation: reactions (2) (main pathway) and (3).

Removal of organic matter (M) and intermediates (I): reactions (4) and (5):

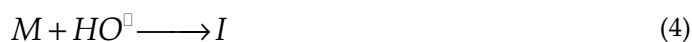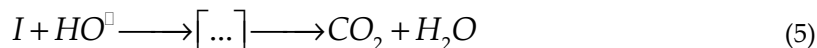

M and I could also be removed by direct photolysis:

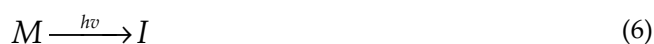

### Ozonation:

Removal of organic matter (M) and intermediates (I) by free radical and direct ozone reactions: reactions (4), (5), (7) and (8).

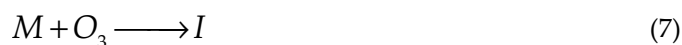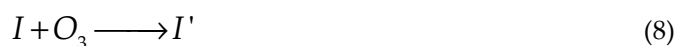

Main initiation step for HO• formation:

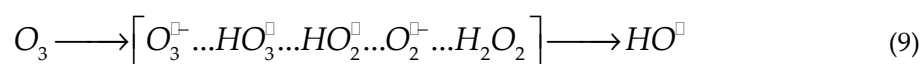

Photoozonation:

Reactions (4) to (9) and:

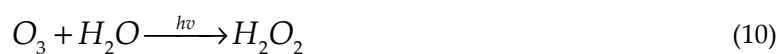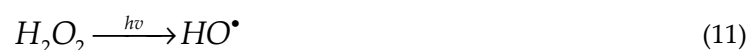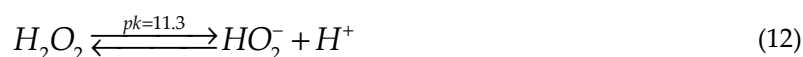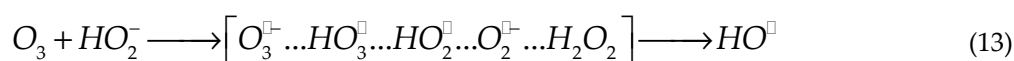

Main initiation steps for HO• formation: reactions (9), (11), and (13)

Photocatalytic Ozonation:

Reactions (1) to (13) and:

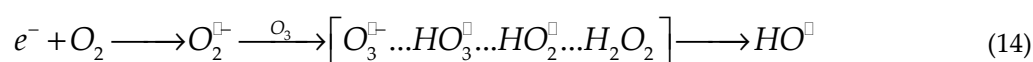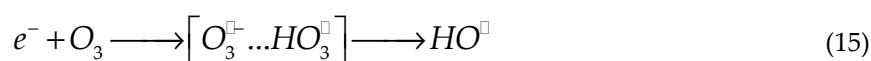

Initiation steps for HO• formation: reactions (2), (3), (9), (11), (13), (14), and (15)

Synergism between ozone and photocatalytic oxidation due to reactions (14) and (15).

## S2. Additional Tables and Figures.

**Table S1.** Main characteristics of wastewater samples (WW).

|     | pH        | DOC (mg/L) | IC (mg/L)  |
|-----|-----------|------------|------------|
| WW1 | 7.6 ± 0.2 | 22.2 ± 1.0 | 69.6 ± 1.6 |
| WW2 | 7.6 ± 0.2 | 26.6 ± 1.0 | 74.2 ± 1.6 |

IC, inorganic carbon; DOC, Dissolved organic carbon.

**Table S2.** List of compounds: (i) that can be identified by the SPE-UHPLC-MS/MS method; (ii) listed in 2013/39/EU Directive and/or (iii) 2018/840/EU Decision; and (iv) detected in WW samples.

| Pesticides        | Detected by<br>SPE-UHPLC-MS/MS | Directive<br>2013/39/EU | Decision<br>2018/840/EU | Detected<br>in WW |
|-------------------|--------------------------------|-------------------------|-------------------------|-------------------|
| Alachlor          | X                              | X                       |                         |                   |
| Atrazine          | X                              | X                       |                         |                   |
| Chlorfenvinphos   | X                              | X                       |                         |                   |
| Clofibric acid    | X                              |                         |                         |                   |
| Acetamiprid       | X                              |                         | X                       |                   |
| Clothianidin      | X                              |                         | X                       |                   |
| Diuron            | X                              | X                       |                         |                   |
| Imidacloprid      | X                              |                         | X                       |                   |
| Isoproturon       | X                              | X                       |                         | X                 |
| Methiocarb        | X                              |                         | X                       |                   |
| Pentachlorophenol | X                              | X                       |                         |                   |
| Simazine          | X                              | X                       |                         |                   |
| Thiacloprid       | X                              |                         | X                       |                   |
| Thiamethoxam      | X                              |                         | X                       |                   |

| Industrial Compounds                       | Detected by<br>SPE-UHPLC-MS/MS | Directive<br>2013/39/EU | Decision<br>2018/840/EU | Detected<br>in WW |
|--------------------------------------------|--------------------------------|-------------------------|-------------------------|-------------------|
| Perfluorooctanesulfonic acid<br>(PFOS)     | X                              | X                       |                         |                   |
| <b>UV Filter</b>                           |                                |                         |                         |                   |
| 2-Ethylhexyl 4-<br>methoxycinnamate (EHMC) |                                |                         |                         |                   |
| <b>Pharmaceuticals</b>                     |                                |                         |                         |                   |
| Atenolol                                   | X                              |                         |                         |                   |
| Atorvastatin                               | X                              |                         |                         |                   |
| Azithromycin                               | X                              |                         | X                       |                   |
| Bezafibrate                                | X                              |                         |                         | X                 |
| Carbamazepine                              | X                              |                         |                         | X                 |

|                     |   |   |   |
|---------------------|---|---|---|
| Cefalexin           | X |   |   |
| Ceftiofur           | X |   |   |
| Ciprofloxacin       | X | X | X |
| Citalopram          | X |   |   |
| Clarithromycin      | X | X | X |
| Clindamycin         | X |   |   |
| Clopidogrel         | X |   | X |
| Diclofenac          | X |   | X |
| Diphenhydramine     | X |   |   |
| Enrofloxacin        | X |   |   |
| Erythromycin        | X | X |   |
| Fluoxetine          | X |   | X |
| Hydrochlorothiazide | X |   |   |
| Ketoprofen          | X |   |   |
| Metoprolol          | X |   | X |
| Norfluoxetine       | X |   |   |
| Ofloxacin           | X |   |   |
| Propranolol         | X |   | X |
| Sulfamethoxazole    | X |   |   |
| Tetracycline        | X |   |   |
| Tramadol            | X |   | X |
| Trimethoprim        | X |   |   |
| Venlafaxine         | X |   | X |
| Warfarin            | X |   |   |

---

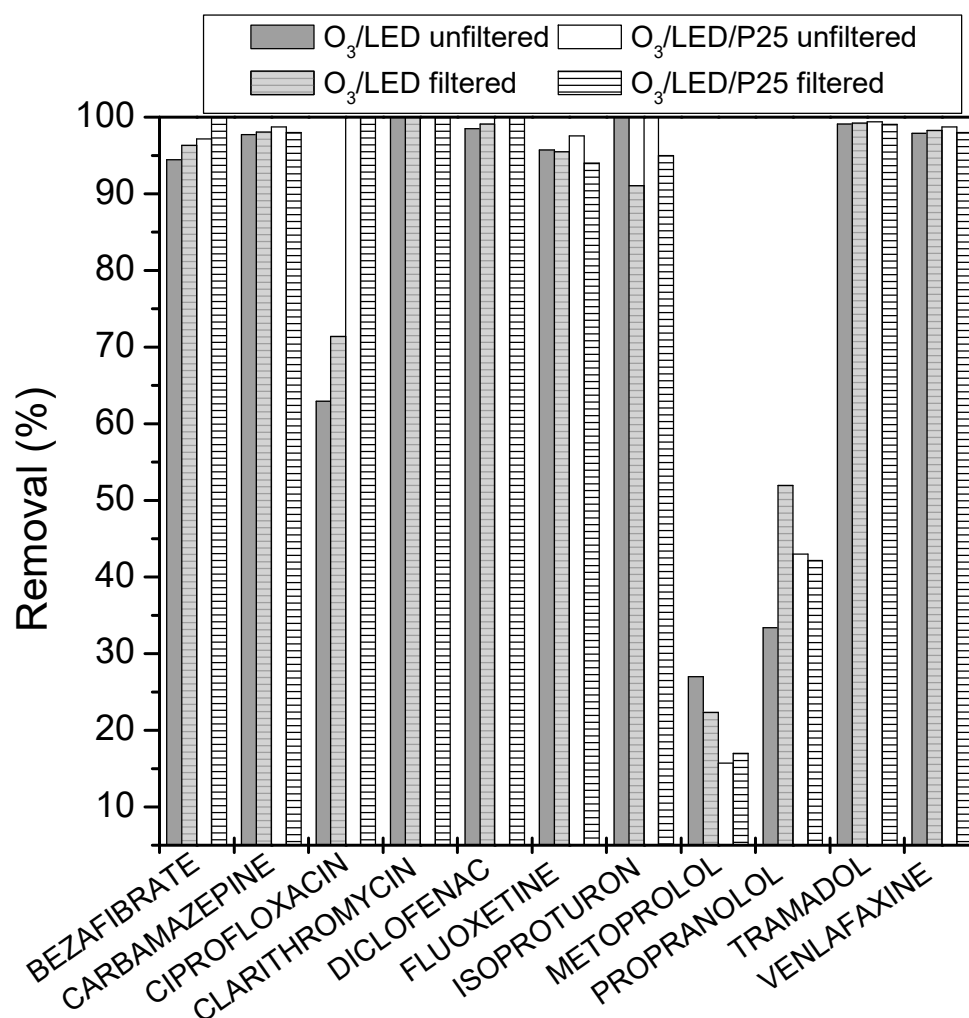

**Figure S1.** Comparison of removal percentage between WW1 filtered and unfiltered in different semi-batch experiments. Conditions: reaction time = 10 min; gas flow rate = 150 mL·min<sup>-1</sup>; P25 loading (when applied) = 0.5 g·L<sup>-1</sup>; ozone concentration = 50 mg·L<sup>-1</sup>.

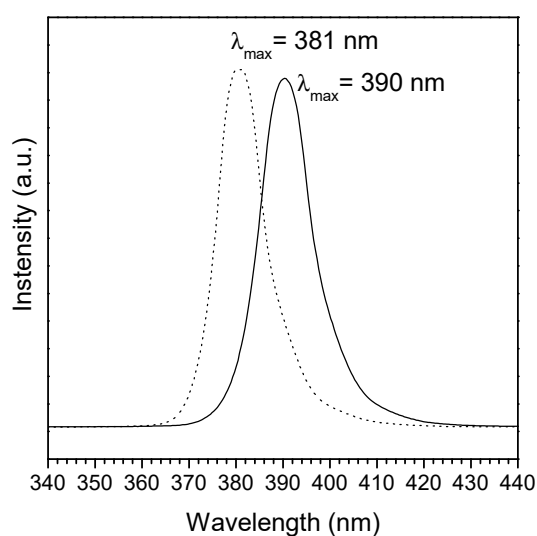

**Figure S2.** Irradiance spectra of UVA LEDs used for semi-batch (solid line) and continuous operation (dotted line).

### S3. Mathematical Models

This part of the study focuses on matching the continuous system to a reactor flow model, taking into consideration two different reactor models. For this purpose, the normalized concentration of the tracer (F function) was determined from step-tracer (NaCl solution 2 g·L<sup>-1</sup>) as described in section 2 of the manuscript.

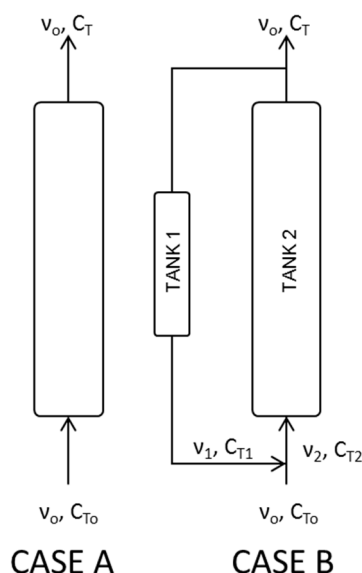

**Figure S3** Case A: The system behaves as one perfectly mixed reactor. Case B: The system behaves as two perfectly mixed reactors in series due to the reaction column and the recirculation column.

**Case A:** Perfectly mixed reactor model.

The F function is related to residence time distribution (RTD) (also known as E function) through equation (1), [1].

$$F = \frac{C_T}{C_{To}} = \int_0^t E dt \quad (1)$$

The E function for perfect mixing conditions is described as follows:

$$E = \frac{1}{t_m} e^{\left(\frac{-t}{t_m}\right)} \quad (2)$$

Then, taking into account both equations (1) and (2):

$$F = \frac{C_T}{C_{To}} = 1 - e^{\left(\frac{-t}{\tau}\right)}, \quad (3)$$

where the hydraulic residence time (HRT,  $\tau$ ) is defined as:

$$\tau = \frac{V}{V_o} \quad (4)$$

**Case B:** Two independent perfectly mixed reactors in series:

In this case, considering the scheme of the set-up, the tracer concentration at the inlet of the main column is described as:

$$C_{T_2} = \frac{C_T v_1 + C_{To} v_0}{v_2} \quad (5)$$

The outlet tracer concentration in tank 1 ( $C_T$ ) and tank 2 ( $C_{T1}$ ) are described as follows:

$$C_T = C_{T_2} \left( 1 - e^{\left( \frac{-t}{\tau_2} \right)} \right) \quad (6)$$

$$C_{T1} = C_T \left( 1 - e^{\left( \frac{-t}{\tau_1} \right)} \right) \quad (7)$$

Where,  $\tau_1$  and  $\tau_2$  being the hydraulic residence times in tank 1 and 2, respectively. Therefore, the F function can be obtained by combining equations (5), (6) and (7):

$$F = \frac{C_T}{C_{To}} = \frac{v_0 \left( 1 - e^{\left( \frac{-t}{\tau_2} \right)} \right)}{v_2 - v_1 \left( 1 - e^{\left( \frac{-t}{\tau_1} \right)} \right) \left( 1 - e^{\left( \frac{-t}{\tau_2} \right)} \right)} \quad (8)$$

Finally, since the packed bed reactor agrees with a perfectly mixed tank model as shown in **Figure S3**, the experimental HRT can be guessed through the linear adjustment of the neperian logarithm form of equation (3).

$$\ln \left( 1 - \frac{C_T}{C_{To}} \right) = -\frac{t}{\tau} \quad (9)$$

Thus, the inverse of the negative slope gives a result of 39 min for the HRT.

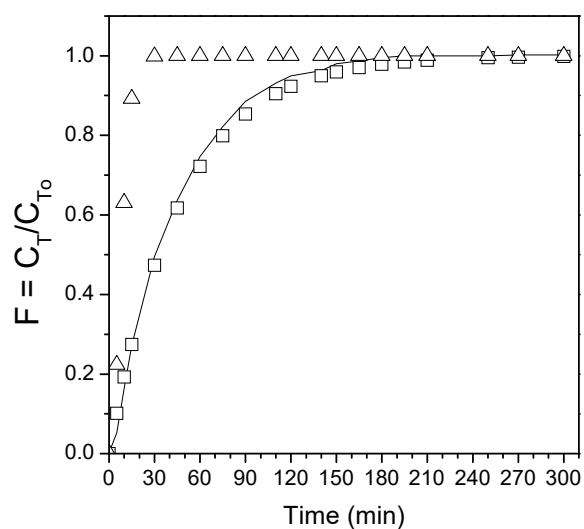

**Figure S4.** F curve versus time from tracer experiment (solid line) and simulated F curves for the reactor set-up in case A (□) and B (Δ).

**S4. P25R Photocatalyst Characterization:** scanning electron microscopy (SEM) and wavelength dispersive X-ray fluorescence (WDXRF)

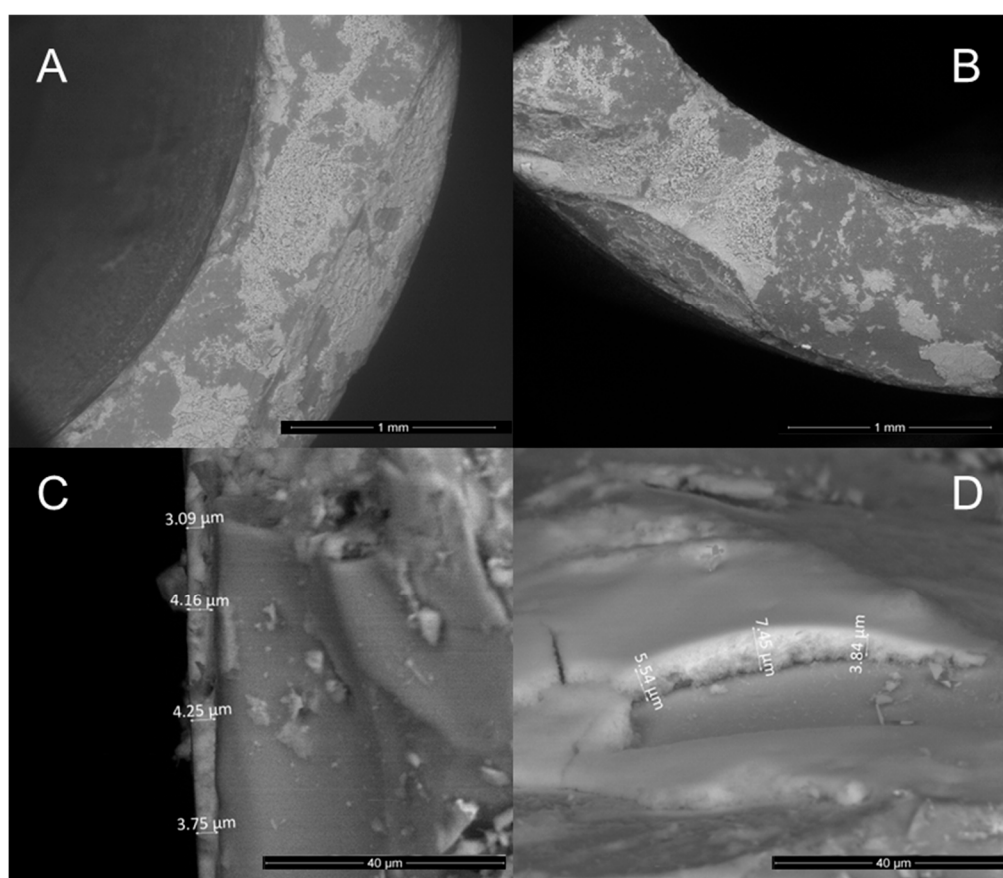

**Figure S5.** SEM images of fresh coated glass rings surface (A and B). Layer thickness measurements in a polished coated glass ring (C) and in a scratched coated glass ring surface (D).

**Table S3.** WDXRF results of uncoated glass rings (R), coated glass rings before treatment (P25R) and after photocatalytic oxidation (O<sub>2</sub>/LED/P25R) and photocatalytic ozonation (O<sub>3</sub>/LED/P25R).

| Oxide                          | Concentration (weight %) |      |                          |                          |
|--------------------------------|--------------------------|------|--------------------------|--------------------------|
|                                | R                        | P25R | O <sub>2</sub> /LED/P25R | O <sub>3</sub> /LED/P25R |
| SiO <sub>2</sub>               | 79.9                     | 79.8 | 80.0                     | 79.5                     |
| B <sub>2</sub> O <sub>3</sub>  | 13.0                     | 13.0 | 13.0                     | 13.0                     |
| Na <sub>2</sub> O              | 3.8                      | 3.8  | 3.7                      | 3.9                      |
| Al <sub>2</sub> O <sub>3</sub> | 2.5                      | 2.4  | 2.4                      | 2.5                      |
| K <sub>2</sub> O               | 0.65                     | 0.65 | 0.68                     | 0.69                     |
| TiO <sub>2</sub>               | 0.03                     | 0.16 | 0.15                     | 0.16                     |
| Impurities                     | 0.07                     | 0.14 | 0.05                     | 0.24                     |

**S5. Reference**

1. Beltrán, F.J., *Ozone reaction kinetics for water and wastewater systems* Lewis Publishers: Florida, U.S. 2004; pp. 1-358.
